# Supplementary material
Source: ML conference proceedings conference paper supplement (https://proceedings.neurips.cc/paper_files/paper/2017/hash/ced556cd9f9c0c8315cfbe0744a3baf0-Abstract.html)
Supplement: Supplementary file 5 [file Results from human benchmarking study for release.xlsx]

## Sheet: Responses
						PhD Chemist	Graduate chemist	Graduate chemist	PhD Chemist	PhD Chemist	PhD Chemist	Graduate Chemist	Graduate Chemist	Graduate non-Chemist that took orgo	Graduate non-Chemist that took orgo
Bin index	Index inside bin	Index	Reaction smiles	Baseline approach template popularity	Baseline approach number of candidates generated	1	2	3	4	5	6	7	8	9	10	Human average	WLDN Model		Human Acc.	Count	Machine acc bin
0	0	37263	[C:1]([c:2]1[cH:3][cH:4][cH:5][cH:6][cH:7]1)(=[O:8])[Cl:9].[CH3:10][CH2:11][CH2:12][NH2:13].[Cl:14][CH2:15][Cl:16]>>[C:1]([c:2]1[cH:3][cH:4][cH:5][cH:6][cH:7]1)(=[O:8])[NH:13][CH2:12][CH2:11][CH3:10]	4012	107	1	1	1	1	1	1	1	1	1	1	1	1		0	11	0.181818
0	1	15220	[CH2:26]1[O:27][CH2:28][CH2:29][CH2:30]1.[CH3:1][O:2][C:3](=[O:4])[c:5]1[n:6](-[c:14]2[cH:15][cH:16][c:17]([O:20][CH3:21])[cH:18][cH:19]2)[c:7]2[cH:8][cH:9][cH:10][cH:11][c:12]2[cH:13]1.[ClH:25].[Li+:24].[OH-:23].[OH2:22].[OH2:31]>>[O:2]=[C:3]([OH:4])[c:5]1[n:6](-[c:14]2[cH:15][cH:16][c:17]([O:20][CH3:21])[cH:18][cH:19]2)[c:7]2[cH:8][cH:9][cH:10][cH:11][c:12]2[cH:13]1	8974	250	1	1	1	1	1	1	1	1	1		0.9	1		0.1	5	0.4
0	2	12303	[CH2:1]([c:2]1[cH:3][cH:4][cH:5][cH:6][cH:7]1)[N:8]1[C:9](=[O:25])[C:10]2([c:16]3[cH:17][cH:18][c:19]([N+:22]([O-:23])=[O:24])[cH:20][cH:21]3)[CH2:11][CH:12]([C:13]1=[O:14])[CH2:15]2.[CH3:26][CH2:27][O:28][C:29](=[O:30])[CH3:31]>>[CH2:1]([c:2]1[cH:3][cH:4][cH:5][cH:6][cH:7]1)[N:8]1[C:9](=[O:25])[C:10]2([c:16]3[cH:17][cH:18][c:19]([NH2:22])[cH:20][cH:21]3)[CH2:11][CH:12]([C:13]1=[O:14])[CH2:15]2	9854	265	0	0			1			0	0	0	0.1	1		0.2	7	0.714286
0	3	5467	[CH3:21][CH2:22][N:23]([CH2:24][CH3:25])[CH2:26][CH3:27].[CH3:28][C:29]([Cl:30])=[O:31].[Cl:32][CH2:33][Cl:34].[NH2:1][CH2:2][C:3]1=[N:4][C:5]2([C:6](=[O:8])[NH:7]1)[CH2:9][CH2:10][N:11]([C:14](=[O:15])[O:16][C:17]([CH3:18])([CH3:19])[CH3:20])[CH2:12][CH2:13]2>>[NH:1]([CH2:2][C:3]1=[N:4][C:5]2([C:6](=[O:8])[NH:7]1)[CH2:9][CH2:10][N:11]([C:14](=[O:15])[O:16][C:17]([CH3:18])([CH3:19])[CH3:20])[CH2:…	4012	403	1	1	1	1	1	1	1	1	1	1	1	1		0.3	6	0.666667
0	4	17963	[CH2:55]([Cl:56])[Cl:57].[CH3:25][c:26]1[n:27][cH:28][c:29]([CH2:32][NH2:33])[n:30][cH:31]1.[CH3:34][CH2:35][N:36]=[C:37]=[N:38][CH2:39][CH2:40][CH2:41][N:42]([CH3:43])[CH3:44].[CH3:58][CH2:59][N:60]([CH2:61][CH3:62])[CH2:63][CH3:64].[CH:1]([CH3:2])([CH3:3])[c:4]1[n:5][n:6][s:7][c:8]1-[c:9]1[cH:10][c:11]([C:12](=[O:13])[OH:14])[cH:15][c:16](-[c:18]2[n:19][cH:20][c:21]([CH3:24])[cH:22][cH:23]2)[cH…	5888	1000	1	1	1	1	1	1	0	1		1	0.8	0		0.4	7	0.857143
0	5	31247	[C:1](#[N:2])[c:3]1[c:4]([CH:24]=[CH:25][C:26](=[O:27])[OH:28])[n:5]([CH:14]2[CH2:15][CH2:16][CH2:17][c:18]3[cH:19][cH:20][cH:21][cH:22][c:23]32)[c:6]2[n:7][c:8]([CH3:13])[cH:9][c:10]([CH3:12])[c:11]12.[C:29]([Cl:30])(=[O:31])[C:32]([Cl:33])=[O:34].[CH2:56]1[O:57][CH2:58][CH2:59][CH2:60]1.[CH:47]([N:48]([CH:49]([CH3:50])[CH3:51])[CH2:52][CH3:53])([CH3:54])[CH3:55].[ClH:35].[O:62]=[CH:63][N:64]([C…	5888	1458	1	1		1	1	1		1			0.6	1		0.5	7	0.857143
0	6	943	[CH3:26][N:27]1[CH2:28][CH2:29][CH2:30][C:31]1=[O:32].[Cl:1][c:2]1[n:3](-[c:12]2[cH:13][cH:14][c:15]([Cl:18])[cH:16][cH:17]2)[n:4][c:5]2[cH:6][c:7]([F:11])[cH:8][cH:9][c:10]12.[NH2:19][CH:20]1[CH2:21][CH2:22][CH2:23][CH2:24][CH2:25]1>>[c:2]1([NH:19][CH:20]2[CH2:21][CH2:22][CH2:23][CH2:24][CH2:25]2)[n:3](-[c:12]2[cH:13][cH:14][c:15]([Cl:18])[cH:16][cH:17]2)[n:4][c:5]2[cH:6][c:7]([F:11])[cH:8][cH:9…	4169	213	1	0	0	0	0.5	0	1	0		0	0.2	1		0.6	10	0.8
0	7	3114	[CH2:42]([N:43]=[C:44]=[N:45][CH2:46][CH2:47][CH2:48][N:49]([CH3:50])[CH3:51])[CH3:52].[CH3:32][N:33]([CH2:34][CH:35]=[CH:36][C:37](=[O:38])[OH:39])[CH3:40].[CH3:64][N:65]([CH3:66])[CH:67]=[O:68].[CH3:70][CH2:71][N:72]([CH2:73][CH3:74])[CH2:75][CH3:76].[ClH:1].[ClH:2].[ClH:31].[ClH:41].[NH2:3][CH2:4][c:5]1[cH:6][c:7]2[n:8][cH:9][n:10][c:11]([NH:14][c:15]3[cH:16][c:17]([Cl:30])[c:18]([O:21][CH2:22…	5888	1588	1	1	0	1	1	1	0	1		0	0.6	0		0.7	7	0.714286
0	8	3126	[CH3:42][CH2:43][OH:44].[Cl:1][c:2]1[cH:3][c:4](-[c:12]2[n:13][n:14][c:15](-[c:17]3[c:18]([CH2:32][CH3:33])[c:19]([CH2:23][N:24]4[CH2:25][CH:26]([C:28](=[O:29])[O:30][CH3:31])[CH2:27]4)[cH:20][cH:21][cH:22]3)[s:16]2)[cH:5][cH:6][c:7]1[O:8][CH:9]([CH3:10])[CH3:11].[ClH:36].[Na+:35].[O:37]1[CH2:38][CH2:39][CH2:40][CH2:41]1.[OH-:34].[OH2:45]>>[Cl:1][c:2]1[cH:3][c:4](-[c:12]2[n:13][n:14][c:15](-[c:17…	8974	457	1	0		0	0	1		0.5		0	0.2	1		0.8	8	0.75
0	9	38158	[CH:36]([OH:37])([CH3:38])[CH3:39].[Cl:16][c:17]1[n:18][cH:19][c:20]([Cl:35])[c:21]([NH:23][c:24]2[c:25]([C:26](=[O:27])[NH:28][CH3:29])[cH:30][cH:31][cH:32][c:33]2[CH3:34])[n:22]1.[NH2:1][c:2]1[cH:3][c:4]2[c:5]([cH:14][cH:15]1)[CH2:6][CH2:7][CH2:8][C:9](=[O:13])[N:10]2[CH2:11][CH3:12]>>[NH:1]([c:2]1[cH:3][c:4]2[c:5]([cH:14][cH:15]1)[CH2:6][CH2:7][CH2:8][C:9](=[O:13])[N:10]2[CH2:11][CH3:12])[c:17…	4169	365	0	1	0	1	1	1	1	1	0		0.6	1		0.9	8	0.875
1	0	7508	[C:2](#[N:3])[CH2:4][NH:5][C:6](=[O:7])[CH:8]1[NH:9][CH2:10][CH:11]([S:13](=[O:14])(=[O:15])[c:16]2[c:17]([Cl:22])[cH:18][cH:19][cH:20][cH:21]2)[CH2:12]1.[CH3:23][CH2:24][C:25]([OH:26])=[O:27].[ClH:1]>>[C:2](#[N:3])[CH2:4][NH:5][C:6](=[O:7])[CH:8]1[N:9]([C:25]([CH2:24][CH3:23])=[O:26])[CH2:10][CH:11]([S:13](=[O:14])(=[O:15])[c:16]2[c:17]([Cl:22])[cH:18][cH:19][cH:20][cH:21]2)[CH2:12]1	2630	181	1	0	0	1	1	1	0	1	0	0	0.5	1		1	4	1
1	1	28755	[CH3:36][C:37]#[N:38].[Cl:1][c:2]1[c:3](-[c:10]2[cH:11][c:12]([O:18][CH3:19])[c:13]([O:16][CH3:17])[cH:14][cH:15]2)[cH:4][n:5][cH:6][c:7]1[C:8]#[N:9].[K+:30].[K+:31].[O-:32][C:33]([O-:34])=[O:35].[OH2:39].[OH:20][c:21]1[cH:22][c:23]2[cH:24][cH:25][nH:26][c:27]2[cH:28][cH:29]1>>[c:2]1([O:20][c:21]2[cH:22][c:23]3[cH:24][cH:25][nH:26][c:27]3[cH:28][cH:29]2)[c:3](-[c:10]2[cH:11][c:12]([O:18][CH3:19])…	2103	306	0	1	1	1	0.5	1	1	1			0.6	1
1	2	5825	[CH3:1][S:2](=[O:3])(=[O:4])[c:5]1[cH:6][cH:7][c:8]([O:14][C:15]([C:16]([F:17])([F:18])[F:19])([CH3:20])[CH3:21])[c:9]([C:10](=[O:11])[OH:12])[cH:13]1.[ClH:22].[F:23][C:24]([CH2:25][c:26]1[cH:27][n:28][c:29]([N:31]2[CH2:32][CH2:33][NH:34][CH2:35][CH2:36]2)[s:30]1)([F:37])[F:38]>>[CH3:1][S:2](=[O:3])(=[O:4])[c:5]1[cH:6][cH:7][c:8]([O:14][C:15]([C:16]([F:17])([F:18])[F:19])([CH3:20])[CH3:21])[c:9](…	2630	182	1	1	0	1	1	1	1	1	0	0	0.7	1
1	3	26759	[C:14](#[N:15])[c:16]1[cH:17][cH:18][c:19]([O:20][CH2:21][CH2:22][CH2:23][CH2:24][CH2:25][O:26][c:27]2[c:28]([O:36][CH3:37])[cH:29][c:30]([C:31](=[O:32])[OH:33])[cH:34][cH:35]2)[cH:38][cH:39]1.[CH3:8][N:9]([CH3:10])[CH2:11][CH2:12][NH2:13].[CH:1]([CH3:2])([CH3:3])[NH:4][CH:5]([CH3:6])[CH3:7].[Cl:41][CH2:42][Cl:43].[OH2:40]>>[CH:1]([CH3:2])([CH3:3])[N:4]([CH:5]([CH3:6])[CH3:7])[C:31]([c:30]1[cH:29…	2630	609	0	0	0	0	0	0	0	0	0.5	0	0	0
1	4	924	[Cl:17][c:18]1[c:19]([C:20](=[O:21])[OH:22])[cH:23][c:24]([S:27]([NH:28][CH3:29])(=[O:30])=[O:31])[cH:25][cH:26]1.[F:1][c:2]1[cH:3][c:4]([C:14]([CH3:15])=[O:16])[cH:5][cH:6][c:7]1[N:8]1[CH2:9][CH2:10][NH:11][CH2:12][CH2:13]1>>[F:1][c:2]1[cH:3][c:4]([C:14]([CH3:15])=[O:16])[cH:5][cH:6][c:7]1[N:8]1[CH2:9][CH2:10][N:11]([C:20]([c:19]2[c:18]([Cl:17])[cH:26][cH:25][c:24]([S:27]([NH:28][CH3:29])(=[O:30…	2630	242	1	1	0	1	1	1	0	1	0	1	0.7	1
1	5	10941	[Br:1][c:2]1[cH:3][cH:4][cH:5][c:6](-[c:8]2[n:9][c:10](-[c:14]3[c:15]([OH:22])[c:16]([O:20][CH3:21])[cH:17][cH:18][cH:19]3)[cH:11][cH:12][cH:13]2)[n:7]1.[CH3:23][c:24]1[c:25]([OH:34])[c:26]([B:31]([OH:32])[OH:33])[cH:27][cH:28][c:29]1[CH3:30]>>[c:2]1(-[c:26]2[c:25]([OH:34])[c:24]([CH3:23])[c:29]([CH3:30])[cH:28][cH:27]2)[cH:3][cH:4][cH:5][c:6](-[c:8]2[n:9][c:10](-[c:14]3[c:15]([OH:22])[c:16]([O:2…	2244	196	1	1	1	1	1	1	1	1	1	1	1	1
1	6	22354	[CH3:18][S:19]([Cl:20])(=[O:21])=[O:22].[CH3:30][CH2:31][O:32][C:33](=[O:34])[CH3:35].[NH2:1][c:2]1[cH:3][c:4]([F:17])[c:5](-[c:9]2[cH:10][cH:11][c:12]([C:15]#[N:16])[n:13]2[CH3:14])[cH:6][c:7]1[F:8].[OH2:23].[cH:24]1[cH:25][cH:26][n:27][cH:28][cH:29]1>>[NH:1]([c:2]1[cH:3][c:4]([F:17])[c:5](-[c:9]2[cH:10][cH:11][c:12]([C:15]#[N:16])[n:13]2[CH3:14])[cH:6][c:7]1[F:8])[S:19]([CH3:18])(=[O:21])=[O:22]	2159	268	1	1	1	1	1	1	1	1	1		0.9	1
1	7	29165	[Cl:1][c:2]1[c:3]([C:14]#[N:15])[c:4](=[O:13])[nH:5][c:6]2[n:7][cH:8][c:9]([F:12])[cH:10][c:11]12.[o:16]1[c:17]([C:21](=[O:22])[N:23]2[CH2:24][CH2:25][NH:26][CH2:27][CH2:28]2)[cH:18][cH:19][cH:20]1>>[c:2]1([N:26]2[CH2:25][CH2:24][N:23]([C:21]([c:17]3[o:16][cH:20][cH:19][cH:18]3)=[O:22])[CH2:28][CH2:27]2)[c:3]([C:14]#[N:15])[c:4](=[O:13])[nH:5][c:6]2[n:7][cH:8][c:9]([F:12])[cH:10][c:11]12	2458	87	0	0	1	0	0	0	1	1		1	0.4	1
1	8	36208	[C:42](=[O:43])([O-:44])[O-:45].[CH2:1]([CH3:2])[O:3][C:4]([CH2:5][CH2:6][CH2:7][O:8][c:9]1[c:10]([CH2:22][CH2:23][C:24](=[O:25])[O:26][CH2:27][CH3:28])[c:11]([CH2:15][CH2:16][CH2:17][CH2:18][CH2:19][CH2:20][Br:21])[cH:12][cH:13][cH:14]1)=[O:29].[CH3:48][N:49]([CH3:50])[CH:51]=[O:52].[CH3:54][C:55](=[O:56])[CH3:57].[I:30][c:31]1[cH:32][c:33]([OH:41])[cH:34][c:35]([S:37](=[O:38])(=[O:39])[CH3:40])…	3364	1116	1	1		1	1	1	0	1			0.6	1
1	9	25695	[Br:1][c:2]1[cH:3][cH:4][c:5]([CH2:7][c:8]2[cH:9][n:10]([CH:18]3[CH:19]([O:20][C:21]([CH3:22])=[O:23])[CH:24]([O:25][C:26]([CH3:27])=[O:28])[CH:29]([O:30][C:31]([CH3:32])=[O:33])[CH:34]([CH2:36][O:37][C:38]([CH3:39])=[O:40])[O:35]3)[c:11]3[cH:12][cH:13][cH:14][c:15]([CH3:17])[c:16]23)[s:6]1.[CH3:51][O:52][CH2:53][CH2:54][O:55][CH3:56].[CH3:57][CH2:58][O:59][C:60](=[O:61])[CH3:62].[Cs+:50].[F-:49]…	2244	3737	1	1	1	1	1	1	1	1	0		0.8	1
2	0	7845	[Cl:27][CH2:28][Cl:29].[F:1][c:2]1[c:3]([N:10]=[C:11]=[O:12])[c:4]([I:9])[cH:5][c:6]([CH3:8])[cH:7]1.[NH2:13][CH:14]1[CH2:15][CH2:16][N:17]([C:20](=[O:21])[O:22][C:23]([CH3:24])([CH3:25])[CH3:26])[CH2:18][CH2:19]1>>[F:1][c:2]1[c:3]([NH:10][C:11](=[O:12])[NH:13][CH:14]2[CH2:15][CH2:16][N:17]([C:20](=[O:21])[O:22][C:23]([CH3:24])([CH3:25])[CH3:26])[CH2:18][CH2:19]2)[c:4]([I:9])[cH:5][c:6]([CH3:8])[…	1580	196	1	1	1	1	1	1	0	1		1	0.8	1
2	1	22643	[Br:1][c:2]1[n:3][n:4][c:5](-[c:7]2[cH:8][cH:9][c:10]([CH2:15][CH:16]([CH3:17])[CH3:18])[c:11]([C:12]#[N:13])[cH:14]2)[s:6]1.[CH2:19]([CH3:20])[c:21]1[c:22]([CH:23]=[O:24])[cH:25][cH:26][cH:27][c:28]1[B:29]1[O:30][C:31]([CH3:32])([CH3:33])[C:34]([CH3:35])([CH3:36])[O:37]1.[CH3:46][N:47]([CH3:48])[CH:49]=[O:50].[K+:43].[K+:44].[K+:45].[OH2:51].[P:38]([O-:39])([O-:40])([O-:41])=[O:42].[cH:52]1[cH:5…	1173	1931	1	1	1	1	1	1	1	1	1		0.9	1
2	2	12663	[CH3:21][C:22](=[O:23])[OH:24].[CH3:25][OH:26].[CH3:3][CH:4]([CH:5]=[O:6])[CH2:7][c:8]1[cH:9][cH:10][cH:11][cH:12][cH:13]1.[CH:14]([CH2:15][CH3:16])=[O:17].[Cl-:19].[Na+:18].[Na+:2].[OH-:1].[OH2:20]>>[CH3:3][CH:4]([CH:5]=[C:15]([CH:14]=[O:17])[CH3:16])[CH2:7][c:8]1[cH:9][cH:10][cH:11][cH:12][cH:13]1	1135	321	1	0	0.5		1	0.5		1	0.5		0.3	1
2	3	2164	[CH3:19][S:20]([Cl:21])(=[O:22])=[O:23].[CH3:1][O:2][C:3](=[O:4])[C:5]1([NH:11][C:12](=[O:13])[O:14][C:15]([CH3:16])([CH3:17])[CH3:18])[CH:6]([CH2:8][CH2:9][OH:10])[CH2:7]1.[Cl:24][CH2:25][Cl:26]>>[CH3:1][O:2][C:3](=[O:4])[C:5]1([NH:11][C:12](=[O:13])[O:14][C:15]([CH3:16])([CH3:17])[CH3:18])[CH:6]([CH2:8][CH2:9][O:10][S:20]([CH3:19])(=[O:22])=[O:23])[CH2:7]1	1375	229	1	1	1	1	1	1	1	1	1	0	0.9	1
2	4	32076	[C:49]([BH3-:50])#[N:51].[CH3:17][O:18][C:19]([CH2:20][CH2:21][c:22]1[n:23][c:24](-[c:27]2[cH:28][cH:29][c:30]([S:33](=[O:34])(=[O:35])[N:36]3[CH2:37][CH2:38][CH:39]([CH:42]=[O:43])[CH2:40][CH2:41]3)[cH:31][cH:32]2)[n:25][o:26]1)=[O:44].[CH3:45][C:46](=[O:47])[OH:48].[NH2:1][CH2:2][CH:3]([OH:4])[c:5]1[cH:6][cH:7][c:8]([OH:16])[c:9]([NH:11][S:12](=[O:13])(=[O:14])[CH3:15])[cH:10]1.[Na+:52]>>[NH:1]…	1630	745	1	1	0.5	1	1	1	0	0	1		0.6	1
2	5	33355	[BH3:36].[C:43]([OH:44])(=[O:45])[CH3:46].[O:1]=[C:2]1[CH2:3][CH2:4][N:5]([c:13]2[cH:14][c:15]([C:19]([F:20])([F:21])[F:22])[cH:16][cH:17][cH:18]2)[CH2:6][CH2:7][N:8]1[CH2:9][CH2:10][CH:11]=[O:12].[c:23]1([C:29]2([OH:35])[CH2:30][CH2:31][NH:32][CH2:33][CH2:34]2)[cH:24][cH:25][cH:26][cH:27][cH:28]1.[n:37]1[cH:38][cH:39][cH:40][cH:41][cH:42]1>>[O:1]=[C:2]1[CH2:3][CH2:4][N:5]([c:13]2[cH:14][c:15]([C…	1586	818	1	1	0	1	1	0.5		1			0.5	1
2	6	6910	[C:41]([BH3-:42])#[N:43].[CH3:23][CH2:24][C:25]([CH2:26][CH3:27])=[O:28].[CH3:30][C:31](=[O:32])[O-:33].[CH3:49][C:50](=[O:51])[OH:52].[Cl:45][CH:46]([Cl:47])[CH3:48].[Na+:29].[Na+:34].[Na+:35].[Na+:44].[O-:36][S:37](=[O:38])(=[O:39])[O-:40].[OH:1][C:2]([CH2:3][CH2:4][CH2:5][CH:6]([CH3:7])[c:8]1[cH:9][n:10][c:11]([NH:13][C:14]([CH:15]([CH2:16][CH2:17][CH3:18])[NH2:19])=[O:20])[s:12]1)([CH3:21])[C…	1026	713	0		0.5	1	1	1	1	0.5		0	0.4	1
2	7	6608	[CH3:35][CH2:36][N:37]([CH2:38][CH3:39])[CH2:40][CH3:41].[CH3:42][C:43]([Cl:44])=[O:45].[Cl:1][c:2]1[cH:3][c:4]([C:9](=[CH:10][C:11](=[N:12][OH:13])[c:14]2[cH:15][c:16]3[c:20]([cH:21][cH:22]2)[CH:19]([NH:23][C:24]([CH2:25][CH:26]([CH3:27])[O:28][CH3:29])=[O:30])[CH2:18][CH2:17]3)[C:31]([F:32])([F:33])[F:34])[cH:5][c:6]([Cl:8])[cH:7]1.[O:46]1[CH2:47][CH2:48][CH2:49][CH2:50]1>>[Cl:1][c:2]1[cH:3][c:…	1020	662	1	1	1	0	1	0	1	1	0	0	0.6	1
2	8	10238	[Br:18][CH2:19][c:20]1[cH:21][cH:22][c:23]([C:24](=[O:25])[O:26][CH3:27])[cH:28][cH:29]1.[CH3:48][N:49]([CH3:50])[CH:51]=[O:52].[H-:16].[Na+:17].[O:43]1[CH2:44][CH2:45][CH2:46][CH2:47]1.[OH:30][C:31]([CH2:32][C:33]([C:34](=[O:35])[OH:36])([CH2:37][C:38](=[O:39])[OH:40])[OH:41])=[O:42].[c:1]1(-[c:7]2[nH:8][c:9]3[cH:10][cH:11][cH:12][cH:13][c:14]3[cH:15]2)[cH:2][cH:3][cH:4][cH:5][cH:6]1>>[c:1]1(-[c…	1366	1499	1	1	1	1	1	1	0	1	1	0	0.8	1
2	9	35568	[Cl:33][c:34]1[cH:35][cH:36][c:37]([CH:38]=[O:39])[cH:40][cH:41]1.[Cl:8][c:9]1[cH:10][cH:11][c:12]([NH:15][C:16]([c:17]2[c:18]([NH:23][C:24](=[O:25])[CH:26]3[CH2:27][CH2:28][NH:29][CH2:30][CH2:31]3)[cH:19][cH:20][cH:21][cH:22]2)=[O:32])[n:13][cH:14]1.[F:1][C:2]([F:3])([F:4])[C:5]([OH:6])=[O:7]>>[Cl:8][c:9]1[cH:10][cH:11][c:12]([NH:15][C:16]([c:17]2[c:18]([NH:23][C:24](=[O:25])[CH:26]3[CH2:27][CH2…	1586	478	1	1	0.5	0.5	0.5	0.5	0.5	0.5	0.5		0.2	1
3	0	34731	[CH3:1][c:2]1[c:3]([C:4](=[O:5])[OH:6])[c:7]([CH3:12])[cH:8][c:9]([CH3:11])[cH:10]1.[S:13]([Cl:14])([Cl:15])=[O:16]>>[CH3:1][c:2]1[c:3]([C:4](=[O:5])[Cl:15])[c:7]([CH3:12])[cH:8][c:9]([CH3:11])[cH:10]1	597	62	1	1	1	1	1	1	1	1	0		0.8	1
3	1	25185	[Al+3:20].[H-:19].[H-:22].[H-:23].[H-:24].[Li+:21].[O:25]1[CH2:26][CH2:27][CH2:28][CH2:29]1.[c:1]1([CH2:7][CH2:8][CH2:9][CH2:10][O:11][CH2:12][CH:13]([CH2:14][N:15]=[N+:16]=[N-:17])[OH:18])[cH:2][cH:3][cH:4][cH:5][cH:6]1>>[c:1]1([CH2:7][CH2:8][CH2:9][CH2:10][O:11][CH2:12][CH:13]([CH2:14][NH2:15])[OH:18])[cH:2][cH:3][cH:4][cH:5][cH:6]1	987	164	1	1	0	1	1	1	1	0	1	1	0.8	1
3	2	23973	[CH3:32][N:33]1[CH2:34][CH2:35][CH:36]([OH:39])[CH2:37][CH2:38]1.[CH3:52][OH:53].[F:1][c:2]1[cH:3][c:4]([OH:12])[c:5]([C:6](=[O:7])[O:8][CH3:9])[cH:10][cH:11]1.[O:40]=[C:41]([O:42][CH2:43][CH3:44])[N:45]=[N:46][C:47]([O:48][CH2:49][CH3:50])=[O:51].[c:13]1([P:14]([c:15]2[cH:16][cH:17][cH:18][cH:19][cH:20]2)[c:21]2[cH:22][cH:23][cH:24][cH:25][cH:26]2)[cH:27][cH:28][cH:29][cH:30][cH:31]1.[cH:54]1[cH…	812	1532	0	1	0	1	1	1	0	1			0.5	1
3	3	18147	[F:1][CH:2]([c:3]1[cH:4][c:5](-[c:14]2[cH:15][c:16]([O:20][CH2:21][CH3:22])[cH:17][cH:18][cH:19]2)[n:6][c:7]2[n:8]1[n:9][cH:10][c:11]2[C:12]#[CH:13])[F:23].[NH2:24][c:25]1[n:26][cH:27][c:28]([Br:31])[cH:29][cH:30]1>>[F:1][CH:2]([c:3]1[cH:4][c:5](-[c:14]2[cH:15][c:16]([O:20][CH2:21][CH3:22])[cH:17][cH:18][cH:19]2)[n:6][c:7]2[n:8]1[n:9][cH:10][c:11]2[C:12]#[C:13][c:28]1[cH:27][n:26][c:25]([NH2:24])…	853	86	1	0			0			1			0.2	1
3	4	12978	[C:21]([CH3:22])(=[O:23])[c:24]1[cH:25][c:26]2[c:27]([s:28]1)[cH:29][cH:30][cH:31][c:32]2[I:33].[CH3:41][c:42]1[cH:43][cH:44][cH:45][cH:46][cH:47]1.[CH3:48][CH2:49][OH:50].[CH:1]([CH3:2])([CH3:3])[c:4]1[c:5]([O:16][CH2:17][CH2:18][CH2:19][CH3:20])[c:6]([B:13]([OH:14])[OH:15])[cH:7][c:8]([CH:10]([CH3:11])[CH3:12])[cH:9]1.[Na+:34].[Na+:35].[O-:36][C:37](=[O:38])[O-:39].[OH2:40].[cH:51]1[cH:52][cH:5…	558	3085	1	1	1	1	1	1	1	1	1		0.9	1
3	5	34958	[CH2:42]([OH:43])[CH2:44][OH:45].[CH3:39][O:40][CH3:41].[Cl:1][c:2]1[n:3][c:4]2[c:5]([Cl:25])[cH:6][cH:7][cH:8][c:9]2[cH:10][c:11]1[CH:12]([CH3:13])[N:14]1[C:15](=[O:24])[c:16]2[cH:17][cH:18][cH:19][cH:20][c:21]2[C:22]1=[O:23].[Cl:26][c:27]1[n:28][cH:29][c:30]([F:36])[cH:31][c:32]1[B:33]([OH:34])[OH:35].[Cs+:38].[Cu:123][I:124].[F-:37].[cH:46]1[cH:47][cH:48][c:49]([P:50]([Pd:51]([P:52]([c:53]2[cH…	643	2358	0	0	1	1	1	1	1	1	1		0.7	1
3	6	32387	[Br:11][CH2:12][CH2:13][CH2:14][CH2:15][CH2:16][CH2:17][O:18][CH2:19][C:20]#[CH:21].[Br:1][c:2]1[n:3][cH:4][c:5]([N+:8](=[O:9])[O-:10])[cH:6][cH:7]1>>[c:2]1([C:21]#[C:20][CH2:19][O:18][CH2:17][CH2:16][CH2:15][CH2:14][CH2:13][CH2:12][Br:11])[n:3][cH:4][c:5]([N+:8](=[O:9])[O-:10])[cH:6][cH:7]1	853	71	0							1			0.1	1
3	7	17586	[CH3:17][OH:18].[Cl:1][c:2]1[c:3]([C:4](=[O:5])[OH:6])[cH:7][cH:8][c:9]([S:11][CH3:12])[cH:10]1.[S:13]([Cl:14])([Cl:15])=[O:16]>>[Cl:1][c:2]1[c:3]([C:4](=[O:5])[O:6][CH3:17])[cH:7][cH:8][c:9]([S:11][CH3:12])[cH:10]1	911	85	0	0.5	0.5	1	0.5	0.5	1	1	1	0	0.4	1
3	8	21251	[CH2:58]1[O:59][CH2:60][CH2:61][CH2:62]1.[CH3:30][O:31][N:32]=[C:33]([c:34]1[c:35]([OH:40])[cH:36][cH:37][cH:38][cH:39]1)[n:41]1[cH:42][n:43][cH:44][cH:45]1.[O:46]=[C:47]([O:48][CH2:49][CH3:50])[N:51]=[N:52][C:53]([O:54][CH2:55][CH3:56])=[O:57].[c:1]1([P:2]([c:3]2[cH:4][cH:5][cH:6][cH:7][cH:8]2)[c:9]2[cH:10][cH:11][cH:12][cH:13][cH:14]2)[cH:15][cH:16][cH:17][cH:18][cH:19]1.[c:20]1([CH:26]([CH2:27…	812	1446	0	0	1	1	1	1	1	1			0.6	0
3	9	16414	[CH3:1][C:2]([CH3:3])([CH3:4])[Si:5]([O:6][c:7]1[c:8]([CH2:22][P:23]([O:24][CH2:25][CH3:26])([O:27][CH2:28][CH3:29])=[O:30])[cH:9][cH:10][c:11]([CH2:13][O:14][Si:15]([C:16]([CH3:17])([CH3:18])[CH3:19])([CH3:20])[CH3:21])[cH:12]1)([CH3:31])[CH3:32].[CH3:34][CH2:35][O:36][C:37]([CH3:38])=[O:39].[CH3:41][CH2:42][OH:43].[ClH:33].[OH2:40]>>[CH3:1][C:2]([CH3:3])([CH3:4])[Si:5]([O:6][c:7]1[c:8]([CH2:22]…	955	535	1	1	1	1	1	1		1	0	1	0.8	0
4	0	2430	[C:11](=[O:12])([O-:13])[O-:14].[CH:17]1([Br:22])[CH2:18][CH2:19][CH2:20][CH2:21]1.[ClH:23].[K+:15].[K+:16].[O:24]=[CH:25][N:26]([CH3:27])[CH3:28].[OH2:29].[OH:1][c:2]1[cH:3][c:4]([CH:5]=[O:6])[cH:7][cH:8][c:9]1[OH:10]>>[OH:1][c:2]1[cH:3][c:4]([CH:5]=[O:6])[cH:7][cH:8][c:9]1[O:10][CH:17]1[CH2:18][CH2:19][CH2:20][CH2:21]1	377	246	1	0		1	1	0.5	0	0		0	0.3	0
4	1	31093	[CH3:16][C:17](=[O:18])[c:19]1[cH:20][cH:21][cH:22][cH:23][cH:24]1.[CH3:1][O:2][c:3]1[cH:4][c:5]([CH:6]=[O:7])[cH:8][c:9]([C:12]([F:13])([F:14])[F:15])[c:10]1[OH:11]>>[CH3:1][O:2][c:3]1[cH:4][c:5]([CH:6]=[CH:16][C:17](=[O:18])[c:19]2[cH:20][cH:21][cH:22][cH:23][cH:24]2)[cH:8][c:9]([C:12]([F:13])([F:14])[F:15])[c:10]1[OH:11]	482	101	0		0	1	0.5	1		1	0.5	0.5	0.3	1
4	2	28171	[C:1]([O:2][C:3](=[O:4])[NH:7][c:8]1[c:9]([NH:19][C:20]([CH2:21][C:22](=[O:5])[c:24]2[cH:25][c:26](-[c:30]3[cH:31][n:32][c:33]([CH3:36])[cH:34][cH:35]3)[cH:27][cH:28][cH:29]2)=[O:37])[cH:10][c:11]([C:15]([F:16])([F:17])[F:18])[c:12]([CH3:14])[cH:13]1)([CH3:6])([CH3:23])[CH3:38].[Cl:46][CH2:47][Cl:48].[F:39][C:40]([F:41])([F:42])[C:43]([OH:44])=[O:45]>>[N:7]1=[C:22]([c:24]2[cH:25][c:26](-[c:30]3[c…	348	593	0	0	0	0	0.5	0.5		0.5	0	0.5	0	1
4	3	29655	[BH4-:1].[C:33](=[O:34])([O-:35])[OH:36].[C:3]([CH3:4])(=[O:5])[O:6][C:7]1([C:8]([CH3:9])=[O:10])[CH2:11][CH2:12][CH:13]2[CH:14]3[CH:15]([OH:32])[CH:16]([Cl:31])[C:17]4=[CH:18][C:19](=[O:30])[O:20][CH:21]([OH:29])[C:22]4([CH3:23])[CH:24]3[CH2:25][CH2:26][C:27]12[CH3:28].[CH3:40][OH:41].[ClH:38].[Na+:2].[Na+:37].[O:42]1[CH2:43][CH2:44][CH2:45][CH2:46]1.[OH2:39]>>[C:3]([CH3:4])(=[O:5])[O:6][C:7]1([…	366	658	0	0		0	1	1		0	0	0	0.2	0
4	4	6571	[Cl:1][CH2:2][C:3](=[O:4])[N:5]1[CH2:6][CH2:7][CH2:8][c:9]2[cH:10][cH:11][cH:12][cH:13][c:14]21.[F:15][C:16]([c:17]1[cH:18][cH:19][c:20]2[c:21]([n:22][c:23]([SH:25])[s:24]2)[cH:26]1)([F:27])[F:28]>>[CH2:2]([C:3](=[O:4])[N:5]1[CH2:6][CH2:7][CH2:8][c:9]2[cH:10][cH:11][cH:12][cH:13][c:14]21)[S:25][c:23]1[n:22][c:21]2[c:20]([cH:19][cH:18][c:17]([C:16]([F:15])([F:27])[F:28])[cH:26]2)[s:24]1	377	102	1	1	1	1	1	1	1	1	1	1	1	1
4	5	34461	[C:1]([CH3:2])([CH3:3])([CH3:4])[O:5][C:6](=[O:7])[NH:8][C:9]([CH2:10][c:11]1[cH:12][nH:13][c:14]2[c:15]([O:20][S:21]([C:22]([F:23])([F:24])[F:25])(=[O:26])=[O:27])[cH:16][cH:17][cH:18][c:19]12)([CH3:28])[CH3:29].[CH3:30][CH2:31][N:32]([CH2:33][CH3:34])[CH2:35][CH3:36].[CH3:45][N:46]([CH3:47])[CH:48]=[O:49].[CH3:50][CH2:51][O:52][C:53](=[O:54])[CH3:55].[Pd:56].[c:114]1([P:115]([c:116]2[cH:117][cH…	229	3587	1	1	1	1	1	1	1	1	0		0.8	1
4	6	34434	[Br-:1].[C:35](#[N:36])[c:37]1[cH:38][cH:39][c:40]([CH:43]2[CH2:44][CH2:45][CH:46]([CH:49]3[CH2:50][CH2:51][CH:52]([CH:55]=[O:56])[CH2:53][CH2:54]3)[CH2:47][CH2:48]2)[cH:41][cH:42]1.[CH2:57]1[O:58][CH2:59][CH2:60][CH2:61]1.[CH3:29][C:30]([CH3:31])([O-:32])[CH3:33].[K+:34].[O:2]1[CH:3]([CH2:8][CH2:9][P+:10]([c:11]2[cH:12][cH:13][cH:14][cH:15][cH:16]2)([c:17]2[cH:18][cH:19][cH:20][cH:21][cH:22]2)[c…	232	986	0			1	1	1	1	1			0.5	1
4	7	29000	[C:1]([CH3:2])([CH3:3])([CH3:4])[NH:5][S:6](=[O:7])(=[O:8])[c:9]1[cH:10][c:11](-[c:15]2[cH:16][c:17](-[c:21]3[n:22][c:23]([CH3:34])[cH:24][c:25](-[c:27]4[cH:28][cH:29][c:30]([Cl:33])[cH:31][cH:32]4)[n:26]3)[cH:18][cH:19][cH:20]2)[cH:12][cH:13][cH:14]1.[Cl:42][CH2:43][Cl:44].[F:35][C:36]([F:37])([F:38])[C:39]([OH:40])=[O:41]>>[NH2:5][S:6](=[O:7])(=[O:8])[c:9]1[cH:10][c:11](-[c:15]2[cH:16][c:17](-[…	220	432	0	0	0	1	1	1		1	0	0	0.4	1
4	8	7889	[Br:13][c:14]1[cH:15][cH:16][c:17]([NH:20][CH3:21])[n:18][cH:19]1.[C:40]([P:41]([C:42]([CH3:43])([CH3:44])[CH3:45])[C:46]([CH3:47])([CH3:48])[CH3:49])([CH3:50])([CH3:51])[CH3:52].[C:53]([P:54]([C:55]([CH3:56])([CH3:57])[CH3:58])[C:59]([CH3:60])([CH3:61])[CH3:62])([CH3:63])([CH3:64])[CH3:65].[CH3:22][O:23][c:24]1[n:25][cH:26][c:27](-[c:28]2[s:29][c:30]3[cH:31][cH:32][cH:33][cH:34][c:35]3[n:36]2)[c…	203	629	0	0		1	1		0	0		0	0.2	1
4	9	33828	[C:33].[CH3:1][O:2][c:3]1[c:4]([CH:14]([CH2:15][CH2:16][CH2:17][CH2:18][C:19]#[C:20][CH2:21][CH2:22][OH:23])[c:24]2[cH:25][cH:26][cH:27][cH:28][cH:29]2)[c:5]([CH3:13])[c:6]([O:11][CH3:12])[c:7]([CH3:10])[c:8]1[CH3:9].[CH3:30][CH2:31][OH:32].[Pd:34]>>[CH3:1][O:2][c:3]1[c:4]([CH:14]([CH2:15][CH2:16][CH2:17][CH2:18][CH2:19][CH2:20][CH2:21][CH2:22][OH:23])[c:24]2[cH:25][cH:26][cH:27][cH:28][cH:29]2)[…	362	245	0			1	1	1		0	1		0.4	0
5	0	33101	[BrH:26].[CH:22]([OH:23])([CH3:24])[CH3:25].[N:18]([O-:19])=[O:20].[N:1]1([CH2:6][c:7]2[n:8][c:9]3[c:10]([nH:11]2)[cH:12][cH:13][c:14]([NH2:16])[cH:15]3)[CH2:2][CH2:3][CH2:4][CH2:5]1.[Na+:21].[OH2:17]>>[N:1]1([CH2:6][c:7]2[n:8][c:9]3[c:10]([nH:11]2)[cH:12][cH:13][c:14]([Br:26])[cH:15]3)[CH2:2][CH2:3][CH2:4][CH2:5]1	176	131	1		0	1	0	1	0	0			0.3	1
5	1	10229	[BrH:25].[CH3:10][C:11](=[O:12])[OH:13].[Cu:26][Br:27].[N:6]([O-:7])=[O:8].[NH2:14][c:15]1[c:16]([F:24])[cH:17][c:18]([C:19]#[N:20])[cH:21][c:22]1[F:23].[Na+:9].[S:1](=[O:2])(=[O:3])([OH:4])[OH:5]>>[c:15]1([Br:25])[c:16]([F:24])[cH:17][c:18]([C:19]#[N:20])[cH:21][c:22]1[F:23]	176	152	1	0		1	1	1	0	0		0	0.4	1
5	2	25714	[CH3:1][c:2]1[n:3][c:4]([NH:11][C:12]([O:13][c:14]2[cH:15][cH:16][cH:17][cH:18][cH:19]2)=[S:20])[c:5]([O:9][CH3:10])[n:6][c:7]1[CH3:8].[Cl:21][c:22]1[cH:23][c:24]([N:29]2[CH2:30][CH2:31][NH:32][CH2:33][CH2:34]2)[cH:25][c:26]([Cl:28])[cH:27]1>>[CH3:1][c:2]1[n:3][c:4]([NH:11][C:12](=[S:20])[N:32]2[CH2:31][CH2:30][N:29]([c:24]3[cH:23][c:22]([Cl:21])[cH:27][c:26]([Cl:28])[cH:25]3)[CH2:34][CH2:33]2)[c…	113	163	0	1	0	0	1	1	1	1		0	0.5	1
5	3	11204	[CH3:35][C:36](=[O:37])[OH:38].[CH:27]([N-:28][CH:29]([CH3:30])[CH3:31])([CH3:32])[CH3:33].[F:1][c:2]1[cH:3][cH:4][c:5]2[c:6]([cH:26]1)[C:7]([C:11](=[O:12])[O:13][CH3:14])([CH2:15][CH2:16][NH:17][O:18][CH2:19][c:20]1[cH:21][cH:22][cH:23][cH:24][cH:25]1)[CH2:8][CH2:9][O:10]2.[Li+:34].[O:39]1[CH2:40][CH2:41][CH2:42][CH2:43]1>>[F:1][c:2]1[cH:3][cH:4][c:5]2[c:6]([cH:26]1)[C:7]1([CH2:8][CH2:9][O:10]2)…	70	814	0	1	1	1	1	1	0	1	1	0	0.7	0
5	4	6092	[C:1]([C:2](=[O:3])[NH:7][c:8]1[cH:9][c:10]([C:14]([c:15]2[cH:16][c:17]([O:25][CH3:26])[c:18]([O:23][CH3:24])[c:19]([O:21][CH3:22])[cH:20]2)=[O:27])[cH:11][cH:12][cH:13]1)([CH3:4])([CH3:5])[CH3:6].[C:28]([OH:29])(=[O:30])[CH3:31].[CH2:33]([O:34][CH2:35][CH3:36])[CH3:37].[CH3:38][C:39](=[O:40])[OH:41].[ClH:32]>>[NH2:7][c:8]1[cH:9][c:10]([C:14]([c:15]2[cH:16][c:17]([O:25][CH3:26])[c:18]([O:23][CH3:…	77	761	0	0	1	1	1	1		0	1	0	0.5	0
5	5	10382	[C:29](=[O:30])([OH:31])[O-:32].[CH3:37][CH2:38][OH:39].[Cl:1][c:2]1[cH:3][cH:4][c:5]([S:8](=[O:9])(=[O:10])[N:11]([CH:12]2[C:13](=[O:19])[NH:14][CH2:15][CH2:16][CH2:17][CH2:18]2)[CH2:20][c:21]2[cH:22][cH:23][c:24]([C:27]#[N:28])[cH:25][cH:26]2)[cH:6][cH:7]1.[ClH:34].[NH2:35][OH:36].[Na+:33].[OH2:40]>>[Cl:1][c:2]1[cH:3][cH:4][c:5]([S:8](=[O:9])(=[O:10])[N:11]([CH:12]2[C:13](=[O:19])[NH:14][CH2:15…	191	553	0	0	0	0	0	0	0	0	0	0	0	0
5	6	34679	[CH3:31][CH2:32][O:33][C:34](=[O:35])[CH3:36].[CH3:3][O:4][CH2:5][CH2:6][O:7][CH2:8][CH2:9][SH:10].[F:11][c:12]1[c:13]([N+:22](=[O:23])[O-:24])[cH:14][c:15]([S:18](=[O:19])(=[O:20])[NH2:21])[cH:16][cH:17]1.[H-:1].[Na+:2].[O:26]1[CH2:27][CH2:28][CH2:29][CH2:30]1.[OH2:25]>>[CH3:3][O:4][CH2:5][CH2:6][O:7][CH2:8][CH2:9][S:10][c:12]1[c:13]([N+:22](=[O:23])[O-:24])[cH:14][c:15]([S:18](=[O:19])(=[O:20])…	130	279	1	1	1	1	1	1		1	0	0	0.7	1
5	7	35483	[C:1]([CH3:2])([CH3:3])([CH3:4])[c:5]1[n:6][o:7][c:8]([NH:10][C:11](=[O:12])[NH:13][c:14]2[cH:15][c:16](-[c:21]3[cH:22][c:23]4[c:24]([n:25][c:26]([S:29][CH3:30])[n:27][cH:28]4)[n:31]([CH3:34])[c:32]3=[O:33])[c:17]([CH3:20])[cH:18][cH:19]2)[cH:9]1.[CH2:37]1[O:38][CH2:39][CH2:40][CH2:41]1.[CH3:35][NH2:36]>>[C:1]([CH3:2])([CH3:3])([CH3:4])[c:5]1[n:6][o:7][c:8]([NH:10][C:11](=[O:12])[NH:13][c:14]2[cH…	156	299	0		1		0	1	0	1			0.3	1
5	8	23765	[CH2:2]([CH3:3])[N:4]([CH2:5][CH2:6][N:7]([c:8]1[cH:9][cH:10][c:11]([C:14]([CH:15]([CH2:16][CH3:17])[c:18]2[cH:19][cH:20][c:21]([O:24][CH3:25])[cH:22][cH:23]2)([c:26]2[cH:27][cH:28][cH:29][cH:30][cH:31]2)[OH:32])[cH:12][cH:13]1)[S:33](=[O:34])(=[O:35])[CH3:36])[CH2:37][CH3:38].[CH3:40][CH2:41][OH:42].[CH:43]([OH:44])([CH3:45])[CH3:46].[ClH:1].[ClH:39]>>[CH2:2]([CH3:3])[N:4]([CH2:5][CH2:6][N:7]([c…	51	592	0	0	0	0	0	0		0	0		0	0
5	9	168	[CH3:59][c:60]1[cH:61][cH:62][cH:63][cH:64][cH:65]1.[F:1][C:2]([CH2:3][NH:4][C:5](=[O:6])[C:7]1([CH2:20][CH2:21][CH2:22][CH2:23][N:24]2[CH2:25][CH2:26][N:27]([c:30]3[n:31][c:32]4[c:33]([Br:40])[cH:34][cH:35][cH:36][c:37]4[cH:38][cH:39]3)[CH2:28][CH2:29]2)[c:8]2[cH:9][cH:10][cH:11][cH:12][c:13]2-[c:14]2[cH:15][cH:16][cH:17][cH:18][c:19]21)([F:41])[F:42].[Na+:53].[Na+:54].[O-:55][C:56](=[O:57])[O-:…	59	1095	1	1	0	1	1	1	1	1		0	0.7	1
6	0	3808	[Br:25][CH2:26][C:27](=[O:28])[c:29]1[cH:30][cH:31][c:32]([Br:35])[cH:33][cH:34]1.[Li+:23].[OH-:22].[OH2:24].[OH:1][CH:2]([CH2:3][C:4](=[O:5])[O:6][CH3:7])[CH2:8][CH2:9][CH2:10][CH2:11][CH2:12][CH2:13][CH2:14][CH2:15][CH2:16][CH2:17][CH2:18][CH:19]([CH3:20])[CH3:21]>>[OH:1][CH:2]([CH2:3][C:4](=[O:5])[O:6][CH2:7][C:27](=[O:28])[c:29]1[cH:30][cH:31][c:32]([Br:35])[cH:33][cH:34]1)[CH2:8][CH2:9][CH2:…	8	445	1	0	0	0	0	0	1	0		0	0.2	0
6	1	37039	[CH2:1]([Li:2])[CH2:3][CH2:4][CH3:5].[CH2:42]1[CH2:43][CH2:44][CH2:45][CH2:46][CH2:47]1.[CH3:14][Si:15]([NH:16][CH2:17][c:18]1[cH:19][cH:20][cH:21][cH:22][cH:23]1)([CH3:24])[CH3:25].[CH3:36][CH2:37][CH2:38][CH2:39][CH2:40][CH3:41].[CH3:6][N:7]([CH3:8])[CH2:9][CH2:10][N:11]([CH3:12])[CH3:13].[c:26]1([P:32](=[O:33])([Cl:34])[Cl:35])[cH:27][cH:28][cH:29][cH:30][cH:31]1>>[CH3:14][Si:15]([N:16]1[CH2:1…	14	766	0.5	0.5	0.5	0.5	0.5	0.5	0	0.5	0	0	0	0
6	2	22932	[CH3:14][O:15][c:16]1[cH:17][c:18]([CH:29]=[C:30]([CH3:31])[CH3:32])[cH:19][c:20]2[c:24]1[O:23][C:22]1([CH2:21]2)[CH2:25][CH2:26][CH2:27][CH2:28]1.[CH3:34][c:35]1[cH:36][cH:37][cH:38][cH:39][cH:40]1.[CH3:41][C:42](=[O:43])[OH:44].[N:1]#[C:2][c:3]1[cH:4][cH:5][cH:6][cH:7][cH:8]1.[NH3:33].[S:9](=[O:10])(=[O:11])([OH:12])[OH:13]>>[N:1]1=[C:2]([c:3]2[cH:4][cH:5][cH:6][cH:7][cH:8]2)[c:19]2[c:18]([cH:1…	5	703	0	0			0			0			0	0
6	3	5988	[C:15](=[O:16])([O-:17])[O-:18].[CH3:21][S-:22].[CH3:25][N:26]([CH3:27])[CH:28]=[O:29].[ClH:24].[Cs+:19].[Cs+:20].[F:1][c:2]1[c:3]([C:4](=[O:5])[OH:6])[cH:7][c:8]([S:11](=[O:12])(=[O:13])[CH3:14])[cH:9][cH:10]1.[Na+:23]>>[c:2]1([S:22][CH3:21])[c:3]([C:4](=[O:5])[OH:6])[cH:7][c:8]([S:11](=[O:12])(=[O:13])[CH3:14])[cH:9][cH:10]1	28	193	1	1	1	1	1	1	1	1		1	0.9	1
6	4	17602	[C:1](=[O:2])([Cl:3])[Cl:4].[CH2:5]1[CH2:6][CH2:7]1.[CH2:9]([c:10]1[cH:11][cH:12][cH:13][cH:14][cH:15]1)[O:16][c:17]1[cH:18][cH:19][c:20]([NH2:21])[cH:22][cH:23]1.[CH3:24][CH2:25][N:26]([CH2:27][CH3:28])[CH2:29][CH3:30].[Cl:31][CH2:32][Cl:33].[ClH:34].[ClH:8]>>[C:1](=[O:2])([CH:5]1[CH2:6][CH2:7]1)[NH:21][c:20]1[cH:19][cH:18][c:17]([O:16][CH2:9][c:10]2[cH:11][cH:12][cH:13][cH:14][cH:15]2)[cH:23][c…	6	428	0	0	0	0	0	0					0	0
6	5	26344	[Br:1][c:2]1[cH:3][n:4][cH:5][c:6]([C:7](=[O:8])[O:9][CH3:10])[cH:11]1.[C:12](#[CH:13])[Si:14]([CH3:15])([CH3:16])[CH3:17].[C:18](=[O:19])([O-:20])[O-:21].[Cu:24][I:25].[K+:22].[K+:23]>>[c:2]1([C:12]#[CH:13])[cH:3][n:4][cH:5][c:6]([C:7](=[O:8])[O:9][CH3:10])[cH:11]1	29	130	0.5	0.5	0.5	0.5	1	0.5	0.5	0.5	0.5		0.1	0
6	6	4326	[BH3:25].[CH3:29][S:30]([CH3:31])=[O:32].[ClH:28].[F:1][c:2]1[c:3]([N:14]2[CH2:15][CH2:16][N:17]([C:20](=[O:21])[O:22][CH2:23][CH3:24])[CH2:18][CH2:19]2)[c:4]([CH2:5][Cl:6])[c:7]([F:13])[c:8]([N+:10](=[O:11])[O-:12])[cH:9]1.[Na:26].[OH2:27]>>[F:1][c:2]1[c:3]([N:14]2[CH2:15][CH2:16][N:17]([C:20](=[O:21])[O:22][CH2:23][CH3:24])[CH2:18][CH2:19]2)[c:4]([CH3:5])[c:7]([F:13])[c:8]([N+:10](=[O:11])[O-:1…	38	146	0	0	0	0	0.5	0		0		0	0	1
6	7	20199	[C:27]([c:28]1[cH:29][cH:30][c:31]([OH:32])[c:33]([C:35]([NH2:36])=[O:37])[cH:34]1)#[N:38].[CH3:12][C:13]1([CH3:26])[O:14][c:15]2[c:16]([cH:20][c:21]([C:24]#[N:25])[cH:22][cH:23]2)[C:17]([Cl:19])=[N:18]1.[CH3:44][C:45](=[O:46])[CH3:47].[H-:9].[N:10]#[N:11].[Na+:8].[O:39]=[CH:40][N:41]([CH3:42])[CH3:43].[nH:1]1[cH:2][cH:3][cH:4][cH:5][c:6]1=[O:7]>>[O:7]=[C:17]1[c:16]2[c:15]([cH:23][cH:22][c:21]([C…	11	477	0	0	0	0	0	0		0			0	0
6	8	26395	[Al+3:29].[CH3:41][CH2:42][O:43][C:44](=[O:45])[CH3:46].[F:1][c:2]1[cH:3][c:4]([CH2:9][C:10]([OH:11])=[O:12])[cH:5][cH:6][c:7]1[F:8].[H-:28].[H-:31].[H-:32].[H-:33].[Li+:30].[NH:13]1[CH2:14][CH2:15][CH:16]([N:19]2[CH2:20][CH2:21][c:22]3[cH:23][cH:24][cH:25][cH:26][c:27]32)[CH2:17][CH2:18]1.[Na+:35].[O:36]1[CH2:37][CH2:38][CH2:39][CH2:40]1.[OH-:34].[OH2:47]>>[F:1][c:2]1[cH:3][c:4]([CH2:9][CH2:10][…	24	636	1	0	0.5	1	0.5	1	0.5	0.5	0.5		0.3	0
6	9	24130	[Br-:19].[CH2:14]1[CH2:15][CH2:16][CH2:17][O:18]1.[CH:20]1([Mg+:21])[CH2:22][CH2:23]1.[n:1]1[c:2]([C:7]([C:8](=[O:9])[O:10][CH2:11][CH3:12])=[O:13])[cH:3][cH:4][cH:5][cH:6]1>>[n:1]1[c:2]([C:7]([C:8](=[O:9])[O:10][CH2:11][CH3:12])([OH:13])[CH:15]2[CH2:16][CH2:17]2)[cH:3][cH:4][cH:5][cH:6]1	24	201	1	1	1	1	1	1	1	1	1	0	0.9	0
7	0	39041	[BH4-:23].[CH3:26][OH:27].[ClH:25].[F:1][c:2]1[cH:3][cH:4][c:5]([CH:6]=[O:7])[cH:8][cH:9]1.[NH2:10][CH:11]([C:12](=[O:13])[OH:14])[c:15]1[cH:16][cH:17][cH:18][cH:19][cH:20]1.[Na+:22].[Na+:24].[O:28]1[CH2:29][CH2:30][O:31][CH2:32][CH2:33]1.[OH-:21]>>[ClH:25].[F:1][c:2]1[cH:3][cH:4][c:5]([CH2:6][NH:10][CH:11]([C:12](=[O:13])[OH:14])[c:15]2[cH:16][cH:17][cH:18][cH:19][cH:20]2)[cH:8][cH:9]1	-1	355	0	1	0.5	1	1	1	1	0.5	1		0.6	1
7	1	22902	[CH:10]([N:11]([CH2:12][CH3:13])[CH:14]([CH3:15])[CH3:16])([CH3:17])[CH3:18].[Cl:19][S:20](=[O:21])(=[O:22])[c:23]1[c:24]([C:25](=[O:26])[O:27][CH3:28])[c:29]([N+:33](=[O:34])[O-:35])[cH:30][cH:31][cH:32]1.[ClH:36].[NH2:1][CH2:2][CH2:3][N:4]1[CH2:5][CH2:6][CH2:7][CH2:8][CH2:9]1.[O:37]1[CH2:38][CH2:39][CH2:40][CH2:41]1>>[ClH:19].[NH:1]([CH2:2][CH2:3][N:4]1[CH2:5][CH2:6][CH2:7][CH2:8][CH2:9]1)[S:20…	-1	397	1	1	1	1	1	1	1	1	1	0	0.9	1
7	2	23347	[C:13]([c:14]1[cH:15][cH:16][cH:17][cH:18][cH:19]1)(=[O:20])[O:21][CH:22]([C:23]([CH3:24])=[O:25])[C:26]([CH3:27])=[O:28].[CH2:8]([Li:9])[CH2:10][CH2:11][CH3:12].[CH3:42][CH2:43][CH2:44][CH2:45][CH2:46][CH3:47].[CH:1]([NH:2][CH:3]([CH3:4])[CH3:5])([CH3:6])[CH3:7].[CH:29](=[O:30])[O:31][CH2:32][CH3:33].[Cl-:36].[ClH:34].[Na+:35].[O:37]1[CH2:38][CH2:39][CH2:40][CH2:41]1>>[C:13]([c:14]1[cH:15][cH:16…	-1	915	0	0	1	0	0	0	0.5	0	0	0	0.1	0
7	3	36673	[Br:20][CH2:21][c:22]1[cH:23][cH:24][c:25](-[c:28]2[cH:29][cH:30][c:31]([CH2:34][CH2:35][CH2:36][CH2:37][CH3:38])[cH:32][cH:33]2)[cH:26][cH:27]1.[CH3:39][CH2:40][O:41][C:42](=[O:43])[CH3:44].[c:1]1([P:7]([c:8]2[cH:9][cH:10][cH:11][cH:12][cH:13]2)[c:14]2[cH:15][cH:16][cH:17][cH:18][cH:19]2)[cH:2][cH:3][cH:4][cH:5][cH:6]1>>[Br-:20].[c:1]1([P+:7]([c:8]2[cH:9][cH:10][cH:11][cH:12][cH:13]2)([c:14]2[cH…	-1	651	1			1	1	1	0	1			0.5	1
7	4	30851	[C:1]([NH2:2])(=[O:3])[c:4]1[cH:5][c:6]([CH3:19])[c:7]([O:11][S:12]([C:13]([F:14])([F:15])[F:16])(=[O:17])=[O:18])[c:8]([CH3:10])[cH:9]1.[CH2:20]([SiH:21]([CH2:22][CH3:23])[CH2:24][CH3:25])[CH3:26].[O-:33][C:34]([CH3:35])=[O:36].[O-:37][C:38]([CH3:39])=[O:40].[O:27]=[CH:28][N:29]([CH3:30])[CH3:31].[Pd+2:32]>>[C:1]([NH2:2])(=[O:3])[c:4]1[cH:5][c:6]([CH3:19])[c:7]([CH:28]=[O:27])[c:8]([CH3:10])[cH:…	-1	340	0	0	0	0		0	0	0			0	0
7	5	9349	[CH2:1]([CH3:2])[O:3][P:4]([O:5][CH2:6][CH3:7])(=[O:8])[CH2:9][CH2:10][OH:11].[CH3:38][CH2:39][O:40][CH2:41][CH3:42].[Cl:35][CH2:36][Cl:37].[F:20][C:21]([S:22](=[O:23])(=[O:24])[O:25][S:26]([C:27]([F:28])([F:29])[F:30])(=[O:31])=[O:32])([F:33])[F:34].[n:12]1[c:13]([CH3:14])[cH:15][cH:16][cH:17][c:18]1[CH3:19]>>[CH2:1]([CH3:2])[O:3][P:4]([O:5][CH2:6][CH3:7])(=[O:8])[CH2:9][O:25][S:22]([C:21]([F:20…	-1	255	1	1	1	0	1	1	1	1			0.7	0
7	6	17425	[C:41]([C:42](=[O:43])[O-:44])(=[O:45])[O-:46].[CH2:47]1[O:48][CH2:49][CH2:50][CH2:51]1.[OH:1][c:2]1[cH:3][cH:4][c:5](-[c:8]2[c:9]([CH2:17][c:18]3[cH:19][cH:20][c:21]([O:24][CH2:25][CH2:26][N:27]4[CH2:28][CH2:29][CH2:30][CH2:31]4)[cH:22][cH:23]3)[c:10]3[c:11]([s:12]2)[cH:13][cH:14][cH:15][cH:16]3)[cH:6][cH:7]1.[OH:32][CH2:33][CH2:34][N:35]1[C:36](=[O:40])[CH2:37][CH2:38][CH2:39]1>>[C:41]([C:42](=…	-1	870	1	1	1					0		1	0.4	1
7	7	6252	[CH3:1][CH:2]([NH2:3])[C:4]([OH:5])=[O:6].[CH3:36][c:37]1[cH:38][cH:39][cH:40][cH:41][cH:42]1.[NH2:27][NH:28][c:29]1[cH:30][cH:31][cH:32][cH:33][cH:34]1.[OH2:15].[OH2:35].[OH:7][CH2:8][c:9]1[cH:10][cH:11][cH:12][cH:13][cH:14]1.[c:16]1([CH3:26])[cH:17][cH:18][c:19]([S:22](=[O:23])(=[O:24])[OH:25])[cH:20][cH:21]1>>[CH3:1][CH:2]([NH2:3])[C:4](=[O:5])[O:6][CH2:8][c:9]1[cH:10][cH:11][cH:12][cH:13][cH:…	-1	721	0	0	0	0	0.5	0		0		1	0.1	0
7	8	25271	[C:1]([O:2][C:3](=[O:4])[NH:8][CH2:9][CH2:10][CH2:11][O:12][c:13]1[cH:14][n:15]2[c:16](=[O:38])[cH:17][c:18]([C:23](=[O:24])[NH:25][CH2:26][CH:27]([C:28](=[O:29])[OH:30])[NH:31][c:32]3[n:33][cH:34][cH:35][cH:36][n:37]3)[cH:19][c:20]2[cH:21][cH:22]1)([CH3:5])([CH3:6])[CH3:7].[ClH:39].[O:40]1[CH2:41][CH2:42][O:43][CH2:44][CH2:45]1>>[ClH:39].[NH2:8][CH2:9][CH2:10][CH2:11][O:12][c:13]1[cH:14][n:15]2[…	-1	560	1	1	1	1	1	1		0	0		0.6	1
7	9	20182	[Br:26][CH2:27][C:28]([C:29](=[O:30])[O:31][CH2:32][CH3:33])=[O:34].[CH3:35][O:36][CH:37]([O:38][CH3:39])[CH3:40].[CH3:41][CH2:42][OH:43].[Cl:13][c:14]1[c:15]([Cl:16])[n:17][c:18]2[c:19]([cH:20][cH:21][cH:22][cH:23]2)[n:24]1.[NH2:1][c:2]1[n:3][c:4]2[cH:5][cH:6][cH:7][cH:8][c:9]2[n:10][c:11]1[Cl:12].[NH3:25]>>[Br-:26].[NH2:1][c:2]1[n+:3]([CH2:27][C:28]([C:29](=[O:30])[O:31][CH2:32][CH3:33])=[O:34]…	-1	480	0	0	0	0	0	0	0	0			0	0
Relaxed criterion, perecent correct						0.575	0.51875	0.45625	0.65625	0.725	0.7	0.425	0.6375	0.2875	0.175		0.6875
Strict criterion, percent correct						0.5625	0.5	0.4	0.6375	0.6625	0.65	0.4	0.5875	0.25	0.1625		0.6875
