# Supplementary material
Source: ML conference proceedings conference paper supplement (https://proceedings.neurips.cc/paper_files/paper/2017/hash/ced556cd9f9c0c8315cfbe0744a3baf0-Abstract.html)
Supplement: Supplementary file [file ced556cd9f9c0c8315cfbe0744a3baf0-Supplemental.zip]

## A Human Evaluation Setup

Here we describe in detail the human evaluation results in Table 2. The evaluation dataset consists of eight groups, defined by the reaction template popularity as binned in Figure 4b, each with ten instances selected randomly from the USPTO test set. We invited in total ten chemists to predict the product given reactants in all groups.

Table 2: Human and model performance on 80 reactions randomly selected from the USPTO test set to cover a diverse range of reaction types. The first 8 are experts with rich experience in organic chemistry (graduate and postdoctoral chemists) and the last two are graduate students in chemical engineering who use organic chemistry concepts regularly but have less formal training. Our model performs at the expert chemist level in terms of top 1 accuracy.

|           |             |      |      |      |      |      |      |      |      |      |
|-----------|-------------|------|------|------|------|------|------|------|------|------|
| Chemist   | 56.3        | 50.0 | 40.0 | 63.8 | 66.3 | 65.0 | 40.0 | 58.8 | 25.0 | 16.3 |
| Our Model | <b>69.1</b> |      |      |      |      |      |      |      |      |      |

Figure 5: Details of human performance

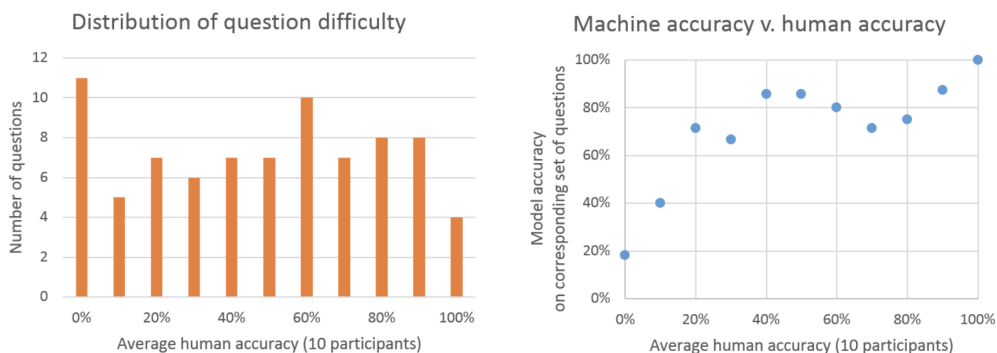

(a) Histogram showing the distribution of question difficulties as evaluated by the average expert performance across all ten performers. (b) Comparison of model performance against human performance for sets of questions as grouped by the average human accuracy shown in Figure 5a

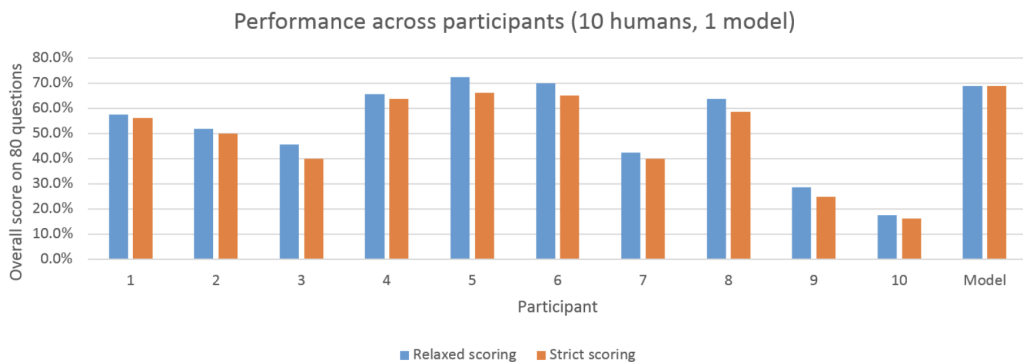

(c) Individual accuracies of each of the 10 human performers and the WLDN model. Human answers were scored for exact matches (strict scoring, also reported in Table 2) and imprecise matches (relaxed scoring), where the difference between the predicted product and the recorded product was small enough to warrant a half-point. The WLDN model performs at the expert level.
